# Supplementary material for: Impacts of Environmental Heterogeneity on Moss Diversity and Distribution of Didymodon (Pottiaceae) in Tibet, China
Source: PubMed Central journal article supplement (PMC4504491; doi:10.1371/journal.pone.0132346), 2015-07-16
Supplement: pone.0132346.s001.pdf [file pone.0132346.s001.pdf]

## Supporting Information

**S1 File. Data matrices used to analyze the relationship between *Didymodon* diversity and habitat properties.** *Didymodon* matrix contains species names and their coverage in the sample plots (**Table A**). Environmental data matrix includes all relevant environmental information for quadrats in which *Didymodon* mosses were present (**Table B**).

**Table A. *Didymodon* matrix used in canonical correspondence analysis.**

| No. | S1 | S2 | S3 | S4 | S5 | S6 | S7 | S8 | S9 | S10 | S11 | S12 | S13 | S14 | S15 | S16 | S17 | S18 | S19 | S20 | S21 | S22 |
|-----|----|----|----|----|----|----|----|----|----|-----|-----|-----|-----|-----|-----|-----|-----|-----|-----|-----|-----|-----|
| 1   | 0  | 0  | 0  | 0  | 0  | 0  | 0  | 0  | 0  | 0   | 0   | 0   | 1   | 0   | 0   | 0   | 2   | 0   | 0   | 0   | 0   | 0   |
| 2   | 2  | 0  | 0  | 0  | 0  | 0  | 0  | 0  | 0  | 0   | 0   | 0   | 0   | 0   | 0   | 0   | 0   | 0   | 0   | 0   | 0   | 0   |
| 3   | 5  | 0  | 15 | 0  | 0  | 0  | 0  | 0  | 0  | 0   | 0   | 0   | 40  | 0   | 0   | 0   | 0   | 0   | 0   | 0   | 0   | 0   |
| 4   | 34 | 0  | 0  | 0  | 0  | 0  | 0  | 0  | 0  | 0   | 0   | 0   | 0   | 0   | 0   | 0   | 0   | 0   | 0   | 0   | 0   | 0   |
| 5   | 22 | 0  | 1  | 0  | 0  | 0  | 0  | 0  | 2  | 0   | 0   | 0   | 0   | 0   | 30  | 0   | 4   | 5   | 0   | 0   | 0   | 0   |
| 7   | 0  | 0  | 0  | 0  | 0  | 0  | 0  | 0  | 0  | 0   | 6   | 0   | 0   | 0   | 0   | 0   | 0   | 0   | 0   | 0   | 0   | 0   |
| 8   | 2  | 0  | 0  | 0  | 0  | 0  | 0  | 0  | 0  | 0   | 0   | 0   | 0   | 0   | 0   | 0   | 0   | 0   | 0   | 0   | 0   | 0   |
| 10  | 0  | 0  | 0  | 0  | 0  | 0  | 0  | 0  | 0  | 0   | 0   | 0   | 5   | 0   | 0   | 0   | 15  | 0   | 0   | 0   | 0   | 0   |
| 11  | 13 | 0  | 0  | 0  | 0  | 0  | 0  | 0  | 0  | 0   | 0   | 0   | 0   | 0   | 0   | 0   | 0   | 0   | 0   | 4   | 0   | 0   |
| 12  | 0  | 0  | 3  | 0  | 0  | 0  | 0  | 0  | 0  | 0   | 0   | 0   | 0   | 0   | 0   | 0   | 0   | 0   | 0   | 0   | 0   | 0   |
| 13  | 28 | 0  | 10 | 0  | 0  | 0  | 0  | 0  | 0  | 0   | 4   | 0   | 0   | 0   | 0   | 0   | 0   | 0   | 0   | 0   | 0   | 0   |
| 14  | 1  | 0  | 0  | 0  | 0  | 0  | 0  | 0  | 0  | 0   | 0   | 0   | 0   | 0   | 0   | 0   | 0   | 0   | 0   | 0   | 0   | 0   |
| 15  | 0  | 0  | 0  | 0  | 20 | 0  | 0  | 0  | 0  | 0   | 0   | 0   | 0   | 0   | 0   | 0   | 0   | 0   | 0   | 0   | 0   | 0   |
| 16  | 10 | 0  | 0  | 0  | 0  | 30 | 0  | 0  | 0  | 0   | 0   | 0   | 0   | 0   | 0   | 0   | 0   | 0   | 0   | 0   | 0   | 0   |
| 17  | 26 | 0  | 25 | 0  | 0  | 8  | 0  | 0  | 0  | 0   | 0   | 0   | 0   | 0   | 0   | 0   | 0   | 0   | 0   | 0   | 0   | 0   |
| 18  | 15 | 0  | 2  | 1  | 0  | 0  | 0  | 0  | 0  | 0   | 0   | 0   | 0   | 0   | 60  | 0   | 0   | 0   | 0   | 0   | 0   | 0   |
| 19  | 0  | 0  | 15 | 0  | 0  | 0  | 0  | 0  | 0  | 0   | 0   | 0   | 0   | 0   | 0   | 0   | 0   | 0   | 0   | 0   | 0   | 0   |
| 20  | 21 | 25 | 0  | 0  | 0  | 0  | 0  | 11 | 20 | 0   | 0   | 0   | 0   | 0   | 0   | 0   | 0   | 0   | 0   | 0   | 0   | 0   |

|    |    |    |    |    |    |    |    |    |    |   |    |   |   |   |   |    |   |    |    |   |   |   |
|----|----|----|----|----|----|----|----|----|----|---|----|---|---|---|---|----|---|----|----|---|---|---|
| 21 | 30 | 0  | 0  | 0  | 0  | 16 | 15 | 0  | 0  | 0 | 0  | 0 | 0 | 0 | 3 | 0  | 0 | 18 | 0  | 0 | 0 | 0 |
| 22 | 2  | 35 | 0  | 0  | 15 | 0  | 0  | 25 | 0  | 0 | 0  | 0 | 0 | 0 | 0 | 0  | 0 | 0  | 0  | 0 | 0 | 0 |
| 23 | 45 | 0  | 0  | 0  | 0  | 0  | 0  | 4  | 0  | 0 | 0  | 0 | 0 | 0 | 0 | 0  | 0 | 0  | 0  | 0 | 0 | 0 |
| 24 | 0  | 0  | 0  | 0  | 0  | 12 | 0  | 8  | 0  | 0 | 0  | 0 | 0 | 0 | 0 | 0  | 0 | 0  | 0  | 0 | 0 | 0 |
| 25 | 25 | 0  | 0  | 3  | 0  | 0  | 12 | 18 | 0  | 0 | 0  | 0 | 0 | 0 | 0 | 0  | 0 | 3  | 0  | 0 | 0 | 0 |
| 26 | 0  | 0  | 0  | 2  | 1  | 0  | 0  | 0  | 0  | 0 | 0  | 0 | 0 | 0 | 0 | 0  | 0 | 0  | 0  | 0 | 0 | 0 |
| 27 | 26 | 12 | 0  | 15 | 0  | 0  | 6  | 10 | 0  | 0 | 0  | 0 | 7 | 0 | 0 | 0  | 0 | 0  | 0  | 0 | 0 | 0 |
| 28 | 5  | 0  | 0  | 0  | 0  | 8  | 0  | 0  | 0  | 0 | 0  | 0 | 0 | 0 | 0 | 0  | 0 | 0  | 0  | 0 | 0 | 0 |
| 29 | 0  | 4  | 0  | 0  | 1  | 2  | 20 | 0  | 1  | 0 | 0  | 0 | 0 | 0 | 1 | 0  | 0 | 0  | 0  | 0 | 0 | 0 |
| 30 | 21 | 5  | 0  | 1  | 0  | 0  | 0  | 0  | 0  | 0 | 0  | 0 | 0 | 0 | 0 | 0  | 0 | 0  | 0  | 0 | 0 | 0 |
| 31 | 7  | 0  | 0  | 1  | 0  | 17 | 0  | 1  | 7  | 0 | 0  | 0 | 0 | 0 | 0 | 10 | 0 | 0  | 0  | 0 | 0 | 0 |
| 32 | 0  | 0  | 2  | 0  | 0  | 3  | 0  | 0  | 0  | 0 | 23 | 0 | 0 | 0 | 0 | 0  | 0 | 0  | 2  | 0 | 0 | 0 |
| 33 | 6  | 0  | 2  | 0  | 0  | 0  | 0  | 0  | 0  | 0 | 0  | 0 | 0 | 0 | 0 | 0  | 0 | 0  | 0  | 0 | 0 | 0 |
| 34 | 0  | 0  | 0  | 0  | 2  | 0  | 0  | 0  | 0  | 0 | 0  | 0 | 0 | 0 | 0 | 0  | 0 | 0  | 0  | 0 | 0 | 0 |
| 35 | 1  | 0  | 0  | 0  | 0  | 0  | 0  | 0  | 0  | 0 | 0  | 0 | 0 | 0 | 1 | 0  | 0 | 0  | 0  | 0 | 0 | 0 |
| 36 | 0  | 20 | 0  | 1  | 12 | 0  | 2  | 0  | 0  | 0 | 5  | 0 | 0 | 0 | 0 | 0  | 0 | 0  | 12 | 0 | 0 | 0 |
| 37 | 0  | 0  | 0  | 0  | 0  | 0  | 0  | 0  | 0  | 0 | 0  | 0 | 1 | 0 | 0 | 0  | 0 | 0  | 0  | 0 | 0 | 0 |
| 38 | 10 | 0  | 1  | 0  | 0  | 0  | 0  | 0  | 30 | 0 | 0  | 0 | 0 | 0 | 0 | 0  | 0 | 0  | 2  | 0 | 0 | 0 |
| 39 | 30 | 0  | 0  | 0  | 0  | 0  | 0  | 6  | 0  | 0 | 0  | 0 | 0 | 0 | 0 | 0  | 0 | 0  | 0  | 0 | 0 | 0 |
| 40 | 20 | 0  | 0  | 0  | 40 | 0  | 0  | 13 | 0  | 0 | 15 | 0 | 0 | 0 | 0 | 0  | 5 | 0  | 0  | 0 | 0 | 0 |
| 41 | 30 | 0  | 0  | 0  | 0  | 15 | 0  | 0  | 0  | 0 | 0  | 0 | 0 | 0 | 0 | 0  | 0 | 0  | 42 | 0 | 0 | 0 |
| 42 | 0  | 3  | 0  | 0  | 0  | 0  | 0  | 0  | 0  | 0 | 0  | 0 | 0 | 0 | 0 | 0  | 0 | 0  | 0  | 0 | 0 | 0 |
| 43 | 0  | 35 | 0  | 0  | 0  | 5  | 0  | 10 | 0  | 0 | 0  | 0 | 0 | 0 | 0 | 0  | 0 | 0  | 0  | 0 | 0 | 0 |
| 44 | 40 | 0  | 0  | 0  | 0  | 0  | 0  | 0  | 0  | 0 | 0  | 0 | 0 | 0 | 0 | 0  | 0 | 0  | 0  | 0 | 0 | 0 |
| 45 | 45 | 0  | 0  | 0  | 0  | 0  | 3  | 0  | 0  | 0 | 10 | 0 | 0 | 0 | 0 | 0  | 0 | 0  | 7  | 0 | 0 | 0 |
| 47 | 8  | 18 | 0  | 0  | 15 | 0  | 15 | 3  | 0  | 0 | 0  | 0 | 0 | 0 | 0 | 0  | 0 | 0  | 0  | 0 | 0 | 0 |
| 48 | 5  | 0  | 20 | 0  | 0  | 0  | 46 | 0  | 0  | 0 | 0  | 0 | 0 | 0 | 0 | 0  | 0 | 0  | 0  | 0 | 0 | 0 |
| 49 | 0  | 0  | 5  | 0  | 0  | 0  | 0  | 0  | 0  | 0 | 2  | 0 | 0 | 0 | 0 | 0  | 0 | 0  | 0  | 0 | 0 | 0 |

|    |    |    |    |    |    |    |    |    |    |   |    |   |    |   |    |   |   |   |   |   |   |   |
|----|----|----|----|----|----|----|----|----|----|---|----|---|----|---|----|---|---|---|---|---|---|---|
| 50 | 15 | 0  | 12 | 0  | 25 | 0  | 15 | 0  | 20 | 0 | 0  | 0 | 0  | 0 | 0  | 0 | 0 | 0 | 0 | 0 | 0 | 0 |
| 51 | 15 | 0  | 4  | 0  | 10 | 40 | 0  | 0  | 0  | 0 | 0  | 0 | 0  | 0 | 0  | 0 | 0 | 0 | 0 | 0 | 0 | 0 |
| 52 | 30 | 0  | 4  | 0  | 25 | 5  | 0  | 0  | 0  | 0 | 0  | 0 | 0  | 0 | 0  | 0 | 0 | 0 | 0 | 0 | 0 | 0 |
| 53 | 0  | 0  | 0  | 0  | 65 | 0  | 0  | 0  | 0  | 0 | 0  | 0 | 0  | 0 | 0  | 0 | 0 | 0 | 0 | 0 | 0 | 0 |
| 54 | 1  | 0  | 2  | 0  | 1  | 0  | 0  | 0  | 0  | 0 | 0  | 0 | 0  | 0 | 0  | 0 | 0 | 0 | 0 | 0 | 0 | 0 |
| 55 | 0  | 0  | 0  | 0  | 0  | 0  | 0  | 0  | 0  | 0 | 10 | 0 | 0  | 0 | 0  | 0 | 0 | 0 | 0 | 0 | 0 | 0 |
| 56 | 15 | 30 | 0  | 0  | 6  | 0  | 0  | 25 | 0  | 0 | 0  | 0 | 0  | 0 | 0  | 0 | 0 | 0 | 0 | 0 | 0 | 0 |
| 57 | 9  | 3  | 5  | 0  | 1  | 0  | 0  | 0  | 1  | 2 | 1  | 0 | 0  | 0 | 0  | 0 | 1 | 0 | 0 | 0 | 0 | 0 |
| 59 | 25 | 10 | 0  | 5  | 5  | 2  | 0  | 2  | 5  | 0 | 0  | 0 | 0  | 0 | 0  | 0 | 0 | 0 | 0 | 0 | 0 | 0 |
| 60 | 7  | 2  | 0  | 0  | 1  | 1  | 0  | 7  | 7  | 0 | 0  | 0 | 0  | 0 | 1  | 0 | 0 | 0 | 0 | 0 | 0 | 0 |
| 61 | 0  | 3  | 0  | 0  | 0  | 0  | 0  | 0  | 0  | 0 | 0  | 0 | 0  | 0 | 0  | 0 | 0 | 0 | 0 | 0 | 0 | 0 |
| 62 | 16 | 0  | 9  | 0  | 0  | 0  | 0  | 0  | 1  | 0 | 0  | 0 | 0  | 0 | 0  | 0 | 0 | 0 | 0 | 0 | 0 | 0 |
| 63 | 24 | 3  | 14 | 0  | 4  | 0  | 1  | 0  | 1  | 0 | 1  | 0 | 3  | 0 | 0  | 0 | 0 | 0 | 1 | 0 | 0 | 0 |
| 64 | 0  | 2  | 0  | 0  | 0  | 0  | 0  | 1  | 4  | 2 | 0  | 0 | 0  | 0 | 0  | 0 | 0 | 0 | 0 | 0 | 0 | 0 |
| 65 | 1  | 1  | 30 | 0  | 5  | 9  | 3  | 1  | 1  | 2 | 0  | 0 | 2  | 0 | 0  | 0 | 0 | 0 | 0 | 0 | 0 | 0 |
| 66 | 8  | 0  | 9  | 0  | 0  | 0  | 0  | 0  | 0  | 1 | 0  | 0 | 28 | 0 | 35 | 0 | 0 | 0 | 0 | 0 | 0 | 0 |
| 67 | 20 | 0  | 2  | 0  | 0  | 0  | 0  | 0  | 0  | 3 | 14 | 0 | 0  | 0 | 0  | 0 | 0 | 0 | 0 | 0 | 0 | 0 |
| 68 | 21 | 3  | 5  | 0  | 0  | 1  | 12 | 13 | 0  | 5 | 0  | 0 | 0  | 0 | 0  | 0 | 1 | 0 | 0 | 0 | 0 | 0 |
| 69 | 0  | 33 | 0  | 0  | 0  | 20 | 0  | 14 | 0  | 0 | 0  | 0 | 0  | 0 | 0  | 0 | 0 | 0 | 0 | 0 | 0 | 0 |
| 70 | 1  | 1  | 0  | 0  | 0  | 0  | 0  | 0  | 0  | 0 | 0  | 0 | 0  | 0 | 0  | 0 | 0 | 0 | 0 | 0 | 0 | 0 |
| 72 | 0  | 0  | 0  | 3  | 0  | 0  | 0  | 0  | 0  | 0 | 0  | 0 | 0  | 0 | 0  | 0 | 0 | 0 | 0 | 0 | 0 | 0 |
| 73 | 29 | 2  | 16 | 3  | 8  | 1  | 0  | 7  | 0  | 2 | 0  | 1 | 1  | 0 | 0  | 0 | 0 | 0 | 0 | 0 | 0 | 0 |
| 75 | 15 | 11 | 1  | 0  | 2  | 1  | 0  | 0  | 0  | 0 | 15 | 0 | 0  | 0 | 0  | 0 | 0 | 0 | 0 | 0 | 0 | 0 |
| 76 | 5  | 11 | 0  | 20 | 0  | 1  | 0  | 0  | 0  | 0 | 0  | 0 | 0  | 0 | 0  | 0 | 0 | 0 | 0 | 0 | 0 | 0 |
| 77 | 43 | 6  | 6  | 0  | 0  | 0  | 0  | 0  | 3  | 6 | 0  | 0 | 0  | 0 | 0  | 0 | 0 | 0 | 0 | 0 | 0 | 0 |
| 78 | 45 | 0  | 0  | 0  | 0  | 0  | 0  | 0  | 0  | 0 | 0  | 0 | 0  | 0 | 0  | 0 | 0 | 0 | 0 | 0 | 0 | 0 |
| 79 | 2  | 0  | 0  | 0  | 0  | 0  | 0  | 0  | 0  | 0 | 0  | 0 | 0  | 0 | 0  | 0 | 0 | 0 | 0 | 0 | 0 | 0 |
| 81 | 1  | 0  | 0  | 0  | 0  | 0  | 0  | 0  | 0  | 0 | 0  | 0 | 0  | 0 | 0  | 0 | 0 | 0 | 0 | 0 | 0 | 0 |

|            |    |    |    |   |   |    |    |   |    |    |   |    |    |    |   |   |    |   |   |   |   |   |
|------------|----|----|----|---|---|----|----|---|----|----|---|----|----|----|---|---|----|---|---|---|---|---|
| <b>84</b>  | 40 | 1  | 0  | 0 | 0 | 1  | 0  | 8 | 0  | 15 | 5 | 0  | 1  | 0  | 0 | 0 | 0  | 0 | 0 | 0 | 0 | 0 |
| <b>85</b>  | 2  | 6  | 0  | 0 | 1 | 1  | 0  | 0 | 0  | 10 | 0 | 0  | 0  | 0  | 0 | 0 | 0  | 0 | 0 | 0 | 0 | 0 |
| <b>88</b>  | 2  | 0  | 0  | 0 | 0 | 0  | 0  | 0 | 0  | 0  | 0 | 0  | 0  | 0  | 0 | 0 | 0  | 0 | 0 | 0 | 0 | 0 |
| <b>89</b>  | 31 | 3  | 7  | 0 | 0 | 1  | 1  | 0 | 0  | 0  | 0 | 0  | 0  | 0  | 0 | 0 | 0  | 0 | 0 | 0 | 0 | 0 |
| <b>90</b>  | 26 | 12 | 10 | 3 | 4 | 3  | 9  | 0 | 3  | 1  | 0 | 3  | 0  | 0  | 2 | 1 | 0  | 0 | 0 | 0 | 0 | 0 |
| <b>92</b>  | 2  | 0  | 0  | 0 | 0 | 0  | 0  | 0 | 0  | 1  | 0 | 0  | 0  | 0  | 0 | 0 | 0  | 0 | 0 | 0 | 0 | 0 |
| <b>94</b>  | 33 | 14 | 11 | 6 | 2 | 0  | 13 | 5 | 0  | 5  | 0 | 8  | 3  | 0  | 0 | 0 | 3  | 0 | 0 | 0 | 0 | 0 |
| <b>95</b>  | 4  | 0  | 14 | 0 | 2 | 0  | 0  | 0 | 0  | 0  | 0 | 5  | 0  | 0  | 0 | 0 | 0  | 0 | 0 | 0 | 0 | 0 |
| <b>96</b>  | 12 | 29 | 5  | 0 | 1 | 0  | 13 | 0 | 0  | 0  | 0 | 0  | 0  | 0  | 0 | 0 | 0  | 0 | 0 | 0 | 0 | 0 |
| <b>97</b>  | 0  | 0  | 0  | 0 | 0 | 0  | 0  | 0 | 0  | 0  | 0 | 2  | 0  | 0  | 0 | 0 | 0  | 0 | 0 | 0 | 0 | 0 |
| <b>98</b>  | 32 | 7  | 18 | 0 | 0 | 0  | 0  | 0 | 0  | 9  | 0 | 26 | 0  | 0  | 0 | 0 | 0  | 0 | 0 | 0 | 0 | 0 |
| <b>101</b> | 1  | 0  | 0  | 0 | 0 | 0  | 0  | 0 | 0  | 0  | 0 | 0  | 0  | 0  | 0 | 0 | 0  | 0 | 0 | 0 | 0 | 0 |
| <b>103</b> | 10 | 39 | 0  | 0 | 0 | 0  | 0  | 0 | 0  | 0  | 0 | 0  | 0  | 0  | 0 | 0 | 0  | 0 | 0 | 0 | 0 | 0 |
| <b>104</b> | 0  | 9  | 4  | 0 | 0 | 0  | 0  | 3 | 0  | 0  | 0 | 0  | 15 | 0  | 0 | 0 | 0  | 0 | 0 | 0 | 0 | 0 |
| <b>105</b> | 5  | 16 | 0  | 0 | 0 | 0  | 3  | 0 | 2  | 2  | 0 | 1  | 3  | 0  | 0 | 0 | 0  | 0 | 0 | 0 | 0 | 0 |
| <b>106</b> | 12 | 3  | 5  | 0 | 0 | 0  | 1  | 0 | 0  | 0  | 0 | 0  | 0  | 9  | 0 | 0 | 15 | 0 | 0 | 0 | 0 | 0 |
| <b>107</b> | 5  | 0  | 8  | 1 | 0 | 0  | 0  | 0 | 0  | 0  | 0 | 0  | 0  | 17 | 3 | 0 | 0  | 0 | 0 | 0 | 0 | 0 |
| <b>108</b> | 7  | 8  | 0  | 0 | 0 | 0  | 0  | 0 | 0  | 0  | 0 | 0  | 0  | 22 | 0 | 0 | 0  | 0 | 0 | 0 | 0 | 0 |
| <b>109</b> | 17 | 8  | 8  | 0 | 0 | 0  | 1  | 0 | 0  | 0  | 0 | 0  | 0  | 4  | 0 | 0 | 0  | 0 | 0 | 0 | 0 | 0 |
| <b>110</b> | 13 | 13 | 0  | 0 | 0 | 0  | 10 | 0 | 13 | 0  | 0 | 4  | 0  | 8  | 0 | 0 | 0  | 0 | 0 | 0 | 0 | 0 |
| <b>111</b> | 8  | 4  | 0  | 0 | 0 | 0  | 0  | 0 | 0  | 0  | 0 | 0  | 0  | 0  | 0 | 0 | 0  | 0 | 0 | 0 | 0 | 0 |
| <b>112</b> | 4  | 4  | 0  | 0 | 0 | 0  | 12 | 0 | 0  | 17 | 0 | 0  | 0  | 0  | 0 | 0 | 0  | 1 | 0 | 0 | 0 | 0 |
| <b>113</b> | 44 | 24 | 0  | 3 | 0 | 0  | 0  | 0 | 2  | 0  | 0 | 0  | 0  | 0  | 0 | 0 | 0  | 0 | 0 | 0 | 0 | 0 |
| <b>114</b> | 0  | 3  | 0  | 0 | 0 | 21 | 0  | 0 | 0  | 0  | 0 | 0  | 0  | 0  | 0 | 0 | 0  | 0 | 0 | 0 | 0 | 0 |
| <b>115</b> | 49 | 1  | 2  | 0 | 2 | 3  | 3  | 0 | 0  | 2  | 0 | 5  | 0  | 0  | 0 | 0 | 0  | 0 | 0 | 0 | 0 | 0 |
| <b>116</b> | 21 | 0  | 0  | 0 | 0 | 2  | 0  | 8 | 0  | 0  | 1 | 7  | 0  | 0  | 0 | 0 | 0  | 8 | 0 | 0 | 0 | 0 |
| <b>117</b> | 77 | 16 | 0  | 0 | 0 | 0  | 0  | 0 | 0  | 0  | 0 | 0  | 0  | 0  | 0 | 0 | 0  | 0 | 0 | 0 | 0 | 0 |
| <b>118</b> | 86 | 0  | 0  | 0 | 0 | 0  | 0  | 0 | 0  | 0  | 0 | 0  | 0  | 0  | 0 | 0 | 0  | 0 | 0 | 0 | 0 | 0 |

|     |    |    |   |    |   |    |   |   |   |    |   |    |   |   |   |    |   |   |   |   |   |    |
|-----|----|----|---|----|---|----|---|---|---|----|---|----|---|---|---|----|---|---|---|---|---|----|
| 119 | 0  | 10 | 0 | 0  | 0 | 0  | 0 | 0 | 0 | 0  | 0 | 0  | 0 | 0 | 0 | 0  | 0 | 0 | 0 | 0 | 0 | 0  |
| 120 | 0  | 0  | 0 | 0  | 0 | 0  | 0 | 0 | 0 | 16 | 0 | 0  | 0 | 0 | 0 | 0  | 0 | 0 | 0 | 0 | 0 | 0  |
| 121 | 4  | 0  | 0 | 0  | 0 | 0  | 0 | 0 | 0 | 0  | 0 | 0  | 0 | 0 | 0 | 0  | 0 | 0 | 0 | 0 | 0 | 0  |
| 122 | 0  | 13 | 0 | 0  | 0 | 0  | 0 | 0 | 0 | 0  | 0 | 0  | 0 | 0 | 0 | 0  | 0 | 0 | 0 | 0 | 0 | 0  |
| 123 | 0  | 5  | 0 | 0  | 0 | 0  | 0 | 0 | 0 | 0  | 0 | 0  | 0 | 0 | 0 | 0  | 0 | 0 | 8 | 0 | 0 | 0  |
| 125 | 0  | 21 | 0 | 0  | 0 | 0  | 0 | 5 | 0 | 0  | 0 | 0  | 0 | 0 | 0 | 5  | 0 | 0 | 0 | 0 | 0 | 0  |
| 126 | 0  | 0  | 0 | 0  | 8 | 0  | 0 | 0 | 0 | 0  | 0 | 0  | 0 | 0 | 0 | 0  | 0 | 0 | 0 | 0 | 0 | 0  |
| 127 | 0  | 0  | 0 | 0  | 0 | 0  | 0 | 0 | 0 | 0  | 0 | 0  | 0 | 0 | 0 | 28 | 0 | 0 | 0 | 0 | 0 | 0  |
| 128 | 0  | 0  | 0 | 0  | 0 | 0  | 0 | 0 | 0 | 0  | 0 | 0  | 0 | 0 | 0 | 5  | 0 | 0 | 0 | 0 | 0 | 0  |
| 129 | 8  | 0  | 0 | 0  | 0 | 0  | 0 | 0 | 0 | 0  | 0 | 0  | 0 | 0 | 0 | 0  | 0 | 0 | 0 | 0 | 0 | 20 |
| 130 | 0  | 0  | 0 | 9  | 0 | 0  | 0 | 0 | 0 | 0  | 0 | 0  | 0 | 0 | 0 | 0  | 0 | 0 | 0 | 0 | 0 | 0  |
| 131 | 0  | 0  | 0 | 33 | 0 | 0  | 0 | 0 | 0 | 0  | 0 | 0  | 0 | 0 | 0 | 0  | 0 | 0 | 0 | 0 | 0 | 0  |
| 132 | 78 | 0  | 0 | 0  | 0 | 0  | 0 | 0 | 0 | 0  | 0 | 0  | 0 | 0 | 0 | 0  | 0 | 0 | 0 | 0 | 0 | 0  |
| 133 | 76 | 0  | 0 | 7  | 0 | 0  | 0 | 0 | 0 | 0  | 0 | 0  | 0 | 0 | 0 | 0  | 0 | 0 | 0 | 0 | 0 | 0  |
| 134 | 91 | 0  | 0 | 0  | 0 | 0  | 0 | 0 | 0 | 0  | 0 | 0  | 0 | 0 | 0 | 0  | 0 | 0 | 0 | 0 | 0 | 0  |
| 135 | 1  | 0  | 0 | 26 | 0 | 0  | 0 | 0 | 0 | 31 | 0 | 0  | 0 | 0 | 0 | 0  | 0 | 0 | 0 | 0 | 0 | 0  |
| 136 | 0  | 0  | 0 | 5  | 0 | 8  | 0 | 0 | 0 | 0  | 0 | 0  | 0 | 0 | 0 | 0  | 0 | 0 | 0 | 0 | 0 | 0  |
| 137 | 0  | 0  | 0 | 0  | 0 | 0  | 0 | 3 | 0 | 0  | 0 | 13 | 0 | 0 | 0 | 0  | 0 | 0 | 0 | 0 | 0 | 0  |
| 138 | 24 | 8  | 0 | 0  | 0 | 0  | 0 | 4 | 0 | 0  | 0 | 0  | 0 | 0 | 0 | 0  | 0 | 4 | 0 | 0 | 0 |    |
| 139 | 44 | 0  | 0 | 0  | 0 | 0  | 0 | 0 | 0 | 0  | 0 | 0  | 0 | 0 | 0 | 0  | 0 | 0 | 0 | 0 | 0 | 0  |
| 140 | 36 | 0  | 0 | 0  | 0 | 0  | 0 | 0 | 0 | 0  | 0 | 0  | 0 | 0 | 0 | 0  | 0 | 0 | 0 | 0 | 0 | 0  |
| 141 | 24 | 8  | 0 | 0  | 0 | 0  | 0 | 4 | 0 | 0  | 0 | 0  | 0 | 0 | 0 | 0  | 0 | 4 | 0 | 0 | 0 |    |
| 142 | 28 | 0  | 0 | 0  | 0 | 0  | 0 | 0 | 0 | 0  | 0 | 0  | 0 | 0 | 0 | 0  | 0 | 0 | 0 | 0 | 0 | 0  |
| 145 | 44 | 0  | 0 | 0  | 0 | 0  | 0 | 0 | 0 | 0  | 0 | 12 | 0 | 0 | 0 | 0  | 0 | 0 | 0 | 0 | 0 | 0  |
| 146 | 0  | 0  | 0 | 0  | 0 | 0  | 0 | 4 | 0 | 0  | 0 | 0  | 0 | 0 | 0 | 0  | 0 | 0 | 0 | 0 | 0 | 0  |
| 147 | 20 | 0  | 0 | 0  | 0 | 0  | 0 | 0 | 0 | 0  | 0 | 0  | 0 | 0 | 0 | 0  | 0 | 0 | 0 | 0 | 0 | 0  |
| 149 | 0  | 36 | 0 | 0  | 0 | 0  | 0 | 0 | 0 | 0  | 0 | 0  | 0 | 0 | 0 | 0  | 0 | 0 | 0 | 0 | 0 | 0  |
| 150 | 0  | 0  | 0 | 0  | 0 | 28 | 0 | 0 | 0 | 0  | 0 | 0  | 0 | 0 | 0 | 0  | 0 | 0 | 0 | 0 | 0 | 0  |

|     |    |    |    |    |    |    |   |    |    |   |    |    |   |   |   |   |   |   |   |   |   |    |
|-----|----|----|----|----|----|----|---|----|----|---|----|----|---|---|---|---|---|---|---|---|---|----|
| 162 | 0  | 0  | 0  | 0  | 25 | 0  | 0 | 0  | 0  | 0 | 0  | 0  | 0 | 0 | 0 | 0 | 0 | 0 | 0 | 0 | 0 | 0  |
| 163 | 60 | 0  | 0  | 0  | 0  | 0  | 0 | 0  | 0  | 0 | 0  | 0  | 0 | 0 | 0 | 0 | 0 | 0 | 0 | 0 | 0 | 0  |
| 164 | 17 | 0  | 0  | 21 | 0  | 0  | 0 | 0  | 0  | 0 | 0  | 0  | 0 | 0 | 5 | 0 | 0 | 0 | 0 | 0 | 0 | 0  |
| 165 | 0  | 0  | 11 | 0  | 0  | 0  | 0 | 0  | 0  | 0 | 0  | 0  | 0 | 0 | 0 | 0 | 0 | 0 | 0 | 0 | 0 | 0  |
| 166 | 15 | 0  | 25 | 0  | 0  | 0  | 0 | 0  | 0  | 0 | 0  | 0  | 0 | 0 | 0 | 0 | 0 | 0 | 0 | 0 | 0 | 0  |
| 167 | 74 | 0  | 0  | 0  | 0  | 0  | 0 | 0  | 0  | 0 | 0  | 0  | 0 | 0 | 0 | 0 | 0 | 0 | 0 | 0 | 0 | 0  |
| 168 | 28 | 0  | 0  | 0  | 0  | 0  | 0 | 0  | 57 | 0 | 0  | 0  | 0 | 0 | 0 | 0 | 0 | 0 | 0 | 0 | 5 | 0  |
| 169 | 33 | 0  | 0  | 0  | 0  | 0  | 0 | 10 | 10 | 0 | 0  | 0  | 0 | 0 | 0 | 0 | 0 | 0 | 0 | 0 | 0 | 0  |
| 170 | 0  | 0  | 0  | 0  | 0  | 0  | 0 | 0  | 0  | 0 | 0  | 33 | 0 | 0 | 0 | 0 | 0 | 0 | 0 | 0 | 0 | 18 |
| 171 | 61 | 0  | 0  | 0  | 0  | 0  | 0 | 0  | 0  | 0 | 0  | 0  | 0 | 0 | 0 | 0 | 0 | 0 | 0 | 0 | 0 | 0  |
| 172 | 13 | 0  | 0  | 13 | 0  | 0  | 0 | 0  | 0  | 0 | 0  | 0  | 0 | 0 | 0 | 0 | 0 | 0 | 0 | 0 | 0 | 0  |
| 173 | 13 | 0  | 0  | 0  | 0  | 0  | 0 | 0  | 0  | 0 | 0  | 0  | 0 | 0 | 0 | 0 | 0 | 0 | 0 | 0 | 0 | 0  |
| 174 | 23 | 1  | 0  | 0  | 0  | 0  | 0 | 7  | 0  | 0 | 0  | 0  | 0 | 0 | 0 | 0 | 0 | 0 | 0 | 0 | 0 | 0  |
| 175 | 18 | 0  | 0  | 0  | 0  | 0  | 0 | 0  | 0  | 0 | 0  | 0  | 0 | 0 | 0 | 0 | 0 | 0 | 0 | 0 | 0 | 0  |
| 177 | 33 | 0  | 0  | 31 | 0  | 0  | 0 | 0  | 0  | 0 | 0  | 0  | 0 | 0 | 0 | 0 | 0 | 0 | 0 | 0 | 0 | 0  |
| 178 | 0  | 10 | 0  | 0  | 0  | 0  | 0 | 0  | 0  | 0 | 0  | 0  | 0 | 0 | 0 | 0 | 0 | 0 | 0 | 0 | 0 | 0  |
| 179 | 20 | 8  | 0  | 7  | 0  | 10 | 0 | 0  | 0  | 0 | 0  | 0  | 0 | 0 | 0 | 0 | 0 | 0 | 0 | 0 | 0 | 0  |
| 181 | 33 | 0  | 0  | 0  | 0  | 0  | 0 | 0  | 0  | 0 | 0  | 0  | 0 | 0 | 0 | 0 | 0 | 0 | 0 | 0 | 0 | 0  |
| 182 | 50 | 0  | 0  | 13 | 0  | 13 | 0 | 0  | 0  | 0 | 0  | 0  | 0 | 0 | 0 | 0 | 0 | 0 | 0 | 0 | 0 | 0  |
| 183 | 0  | 0  | 0  | 0  | 0  | 10 | 0 | 0  | 0  | 0 | 0  | 0  | 0 | 0 | 0 | 0 | 0 | 0 | 0 | 0 | 0 | 0  |
| 184 | 13 | 0  | 0  | 0  | 0  | 0  | 0 | 0  | 0  | 0 | 0  | 0  | 0 | 0 | 0 | 0 | 0 | 0 | 0 | 0 | 0 | 0  |
| 185 | 0  | 0  | 0  | 0  | 0  | 5  | 0 | 0  | 0  | 0 | 0  | 0  | 0 | 0 | 0 | 0 | 0 | 0 | 0 | 0 | 0 | 0  |
| 186 | 0  | 0  | 0  | 0  | 0  | 0  | 0 | 0  | 3  | 0 | 0  | 0  | 0 | 0 | 0 | 0 | 0 | 0 | 0 | 0 | 0 | 0  |
| 187 | 0  | 0  | 0  | 3  | 0  | 0  | 0 | 0  | 0  | 0 | 0  | 0  | 0 | 0 | 0 | 0 | 0 | 0 | 0 | 0 | 0 | 0  |
| 188 | 0  | 0  | 0  | 5  | 0  | 0  | 0 | 0  | 0  | 0 | 0  | 0  | 0 | 0 | 0 | 0 | 0 | 0 | 0 | 0 | 0 | 0  |
| 189 | 0  | 0  | 0  | 0  | 0  | 0  | 0 | 0  | 13 | 0 | 0  | 0  | 0 | 0 | 0 | 0 | 0 | 0 | 0 | 0 | 0 | 0  |
| 190 | 13 | 0  | 0  | 0  | 0  | 0  | 0 | 0  | 0  | 0 | 0  | 0  | 0 | 0 | 0 | 0 | 0 | 0 | 0 | 0 | 0 | 0  |
| 191 | 0  | 0  | 0  | 0  | 0  | 0  | 0 | 0  | 0  | 0 | 33 | 0  | 0 | 0 | 0 | 0 | 0 | 0 | 0 | 0 | 0 | 0  |

|     |    |   |   |   |   |    |   |   |   |   |    |   |    |   |   |   |   |   |   |   |   |   |
|-----|----|---|---|---|---|----|---|---|---|---|----|---|----|---|---|---|---|---|---|---|---|---|
| 192 | 13 | 0 | 0 | 0 | 0 | 0  | 0 | 0 | 0 | 0 | 0  | 0 | 0  | 0 | 0 | 0 | 0 | 0 | 0 | 0 | 0 | 0 |
| 193 | 18 | 0 | 0 | 0 | 0 | 0  | 0 | 0 | 0 | 0 | 0  | 0 | 0  | 0 | 0 | 0 | 0 | 0 | 0 | 0 | 0 | 0 |
| 194 | 0  | 0 | 0 | 0 | 0 | 0  | 0 | 0 | 0 | 0 | 0  | 8 | 0  | 0 | 0 | 0 | 0 | 0 | 0 | 0 | 0 | 0 |
| 195 | 0  | 0 | 0 | 0 | 0 | 0  | 0 | 0 | 3 | 0 | 0  | 0 | 0  | 0 | 0 | 0 | 0 | 0 | 0 | 0 | 0 | 0 |
| 196 | 13 | 0 | 0 | 0 | 0 | 0  | 0 | 0 | 0 | 0 | 0  | 0 | 0  | 0 | 0 | 0 | 0 | 0 | 0 | 0 | 0 | 0 |
| 197 | 18 | 0 | 0 | 0 | 0 | 0  | 0 | 0 | 0 | 0 | 0  | 0 | 0  | 0 | 0 | 0 | 0 | 0 | 0 | 0 | 0 | 0 |
| 198 | 0  | 4 | 0 | 0 | 0 | 0  | 0 | 0 | 0 | 0 | 0  | 0 | 0  | 0 | 0 | 0 | 0 | 0 | 0 | 0 | 0 | 0 |
| 199 | 8  | 0 | 0 | 0 | 0 | 0  | 0 | 0 | 0 | 0 | 0  | 0 | 0  | 0 | 0 | 0 | 0 | 0 | 0 | 0 | 0 | 0 |
| 200 | 4  | 0 | 0 | 0 | 0 | 0  | 0 | 0 | 0 | 0 | 0  | 0 | 0  | 0 | 0 | 0 | 0 | 0 | 0 | 0 | 0 | 0 |
| 201 | 16 | 0 | 0 | 0 | 0 | 0  | 0 | 0 | 0 | 0 | 0  | 0 | 0  | 0 | 0 | 0 | 0 | 0 | 0 | 0 | 0 | 0 |
| 202 | 20 | 0 | 0 | 0 | 0 | 0  | 0 | 0 | 0 | 0 | 0  | 0 | 0  | 0 | 0 | 0 | 0 | 0 | 0 | 0 | 0 | 0 |
| 203 | 4  | 0 | 0 | 0 | 0 | 0  | 0 | 0 | 0 | 0 | 0  | 0 | 0  | 0 | 0 | 0 | 0 | 0 | 0 | 0 | 0 | 0 |
| 204 | 8  | 0 | 0 | 0 | 0 | 0  | 0 | 0 | 0 | 0 | 0  | 0 | 0  | 0 | 0 | 0 | 0 | 0 | 0 | 0 | 0 | 0 |
| 206 | 0  | 0 | 0 | 4 | 0 | 0  | 0 | 0 | 0 | 0 | 0  | 0 | 0  | 0 | 0 | 0 | 0 | 0 | 0 | 0 | 0 | 0 |
| 207 | 0  | 0 | 0 | 0 | 0 | 12 | 0 | 0 | 0 | 0 | 0  | 0 | 0  | 0 | 0 | 0 | 0 | 0 | 0 | 0 | 0 | 0 |
| 209 | 0  | 0 | 0 | 0 | 0 | 0  | 0 | 0 | 0 | 0 | 0  | 0 | 16 | 0 | 0 | 0 | 0 | 0 | 0 | 0 | 0 | 0 |
| 211 | 8  | 0 | 0 | 0 | 0 | 0  | 0 | 0 | 0 | 0 | 0  | 0 | 0  | 0 | 0 | 0 | 0 | 0 | 0 | 0 | 0 | 0 |
| 212 | 0  | 0 | 0 | 0 | 0 | 0  | 0 | 0 | 0 | 0 | 4  | 0 | 0  | 0 | 0 | 0 | 0 | 0 | 0 | 0 | 0 | 0 |
| 214 | 36 | 0 | 0 | 0 | 0 | 0  | 0 | 0 | 0 | 0 | 0  | 0 | 0  | 0 | 0 | 0 | 0 | 0 | 0 | 0 | 0 | 0 |
| 215 | 0  | 0 | 0 | 0 | 0 | 0  | 0 | 0 | 0 | 0 | 36 | 0 | 0  | 0 | 0 | 0 | 0 | 0 | 0 | 0 | 0 | 0 |
| 216 | 0  | 1 | 0 | 0 | 0 | 0  | 0 | 0 | 0 | 0 | 0  | 0 | 0  | 0 | 0 | 0 | 0 | 0 | 0 | 0 | 0 | 0 |
| 217 | 0  | 0 | 0 | 0 | 0 | 0  | 0 | 0 | 0 | 0 | 0  | 0 | 0  | 0 | 0 | 5 | 0 | 0 | 0 | 0 | 0 | 0 |
| 218 | 20 | 0 | 0 | 0 | 0 | 0  | 0 | 0 | 0 | 0 | 0  | 0 | 0  | 0 | 0 | 0 | 0 | 0 | 0 | 0 | 0 | 0 |
| 220 | 0  | 0 | 0 | 0 | 5 | 0  | 0 | 0 | 0 | 0 | 0  | 0 | 0  | 0 | 0 | 0 | 0 | 0 | 0 | 0 | 0 | 0 |
| 221 | 44 | 0 | 0 | 0 | 0 | 0  | 0 | 0 | 0 | 0 | 0  | 0 | 0  | 0 | 0 | 0 | 0 | 0 | 0 | 0 | 0 | 0 |

Note: S1–S22 refers to *Didymodon* species listed in Table 3.

**Table B. Environmental data matrix used in canonical correspondence analysis.**

| No. | Altitude | Veg-types | Veg-cover | Substrate | Temp | TDR3.8 |
|-----|----------|-----------|-----------|-----------|------|--------|
| 1   | 3994     | 1         | 75        | 1         | 0    | 0      |
| 2   | 3764     | 1         | 50        | 1         | 18   | 50     |
| 3   | 4362     | 2         | 85        | 1         | 0    | 0      |
| 4   | 3254     | 3         | 85        | 1         | 30   | 9      |
| 5   | 4090     | 1         | 75        | 1         | 31   | 7      |
| 7   | 1849     | 5         | 90        | 1         | 0    | 0      |
| 8   | 1725     | 5         | 90        | 1         | 0    | 0      |
| 10  | 2725     | 2         | 95        | 1         | 18   | 20     |
| 11  | 2748     | 3         | 55        | 1         | 0    | 0      |
| 12  | 3880     | 6         | 30        | 1         | 0    | 0      |
| 13  | 2934     | 3         | 30        | 1         | 27   | 15     |
| 14  | 3017     | 3         | 65        | 1         | 22   | 25     |
| 15  | 3163     | 7         | 30        | 1         | 27   | 14     |
| 16  | 3729     | 3         | 30        | 1         | 31   | 19     |
| 17  | 3573     | 8         | 55        | 1         | 22   | 14     |
| 18  | 3582     | 8         | 45        | 1         | 0    | 0      |
| 19  | 3550     | 9         | 60        | 1         | 16   | 55     |
| 20  | 3674     | 1         | 80        | 1         | 35   | 29     |
| 21  | 3755     | 1         | 30        | 1         | 31   | 9      |
| 22  | 3799     | 6         | 20        | 1         | 24   | 23     |
| 23  | 3821     | 1         | 85        | 1         | 36   | 15     |
| 24  | 3932     | 1         | 20        | 1         | 13   | 24     |
| 25  | 4140     | 18        | 40        | 2         | 23   | 28     |
| 26  | 4022     | 1         | 55        | 1         | 24   | 35     |
| 27  | 4589     | 18        | 80        | 2         | 18   | 25     |



|    |      |    |    |   |    |    |
|----|------|----|----|---|----|----|
| 28 | 4418 | 13 | 60 | 1 | 18 | 18 |
| 29 | 5185 | 18 | 20 | 2 | 12 | 8  |
| 30 | 4419 | 14 | 65 | 1 | 14 | 29 |
| 31 | 4613 | 14 | 65 | 1 | 36 | 21 |
| 32 | 4818 | 6  | 45 | 1 | 16 | 27 |
| 33 | 4996 | 14 | 75 | 1 | 12 | 43 |
| 34 | 4289 | 3  | 30 | 1 | 9  | 20 |
| 35 | 4321 | 17 | 20 | 0 | 0  | 0  |
| 36 | 4379 | 17 | 10 | 1 | 12 | 48 |
| 37 | 4955 | 13 | 15 | 0 | 29 | 0  |
| 38 | 2890 | 16 | 95 | 1 | 15 | 48 |
| 39 | 4037 | 8  | 35 | 1 | 36 | 14 |
| 40 | 3895 | 9  | 45 | 1 | 26 | 35 |
| 41 | 4089 | 9  | 55 | 1 | 27 | 6  |
| 42 | 4382 | 1  | 15 | 1 | 33 | 0  |
| 43 | 4461 | 1  | 65 | 1 | 24 | 13 |
| 44 | 3665 | 9  | 65 | 1 | 18 | 17 |
| 45 | 4078 | 17 | 40 | 1 | 31 | 0  |
| 47 | 4370 | 14 | 65 | 1 | 34 | 6  |
| 48 | 4277 | 1  | 65 | 1 | 28 | 26 |
| 49 | 4175 | 14 | 65 | 1 | 28 | 23 |
| 50 | 4074 | 14 | 60 | 1 | 27 | 18 |
| 51 | 3980 | 14 | 35 | 1 | 27 | 18 |
| 52 | 3879 | 14 | 60 | 1 | 29 | 11 |
| 53 | 3776 | 14 | 60 | 1 | 14 | 4  |
| 54 | 3738 | 14 | 60 | 1 | 14 | 4  |
| 55 | 3697 | 20 | 95 | 1 | 18 | 0  |
| 56 | 3697 | 9  | 65 | 1 | 18 | 0  |

|    |      |    |    |   |    |    |
|----|------|----|----|---|----|----|
| 57 | 4575 | 14 | 80 | 1 | 10 | 27 |
| 59 | 4570 | 14 | 30 | 1 | 14 | 23 |
| 60 | 4628 | 1  | 10 | 1 | 34 | 12 |
| 61 | 4612 | 17 | 55 | 1 | 24 | 49 |
| 62 | 4641 | 1  | 50 | 1 | 26 | 23 |
| 63 | 4745 | 1  | 15 | 2 | 20 | 35 |
| 64 | 4634 | 1  | 15 | 2 | 18 | 19 |
| 65 | 4725 | 14 | 45 | 1 | 20 | 24 |
| 66 | 5227 | 14 | 45 | 1 | 16 | 37 |
| 67 | 4581 | 1  | 35 | 1 | 12 | 13 |
| 68 | 4679 | 14 | 65 | 1 | 18 | 18 |
| 69 | 4573 | 1  | 75 | 1 | 31 | 20 |
| 70 | 4585 | 1  | 50 | 1 | 35 | 11 |
| 72 | 4605 | 1  | 40 | 1 | 43 | 9  |
| 73 | 4699 | 1  | 45 | 1 | 17 | 6  |
| 75 | 4690 | 14 | 45 | 1 | 21 | 10 |
| 76 | 4773 | 1  | 40 | 1 | 13 | 21 |
| 77 | 5078 | 1  | 35 | 1 | 22 | 14 |
| 78 | 5273 | 0  | 0  | 0 | 0  | 0  |
| 79 | 4870 | 1  | 25 | 1 | 10 | 14 |
| 81 | 4959 | 1  | 20 | 1 | 0  | 0  |
| 84 | 4644 | 14 | 30 | 2 | 10 | 17 |
| 85 | 4628 | 14 | 40 | 1 | 39 | 8  |
| 88 | 4506 | 1  | 40 | 1 | 23 | 18 |
| 89 | 4930 | 1  | 35 | 1 | 15 | 19 |
| 90 | 4556 | 1  | 50 | 1 | 13 | 29 |
| 92 | 4639 | 1  | 35 | 1 | 17 | 0  |
| 94 | 4590 | 1  | 50 | 1 | 8  | 22 |

|     |      |    |    |   |     |    |
|-----|------|----|----|---|-----|----|
| 95  | 4585 | 13 | 20 | 1 | 34  | 12 |
| 96  | 4473 | 14 | 85 | 1 | 28  | 12 |
| 97  | 4454 | 6  | 10 | 2 | 0   | 0  |
| 98  | 4445 | 13 | 10 | 2 | 27  | 6  |
| 101 | 4450 | 13 | 5  | 2 | 0   | 0  |
| 103 | 4321 | 1  | 70 | 1 | 30  | 16 |
| 104 | 5325 | 18 | 75 | 1 | 9   | 17 |
| 105 | 5283 | 18 | 40 | 2 | -4  | 11 |
| 106 | 5173 | 14 | 95 | 1 | 11  | 40 |
| 107 | 5082 | 14 | 95 | 1 | 10  | 44 |
| 108 | 4976 | 14 | 95 | 1 | 8   | 37 |
| 109 | 4888 | 3  | 85 | 1 | 4   | 0  |
| 110 | 4789 | 3  | 90 | 1 | 4   | 0  |
| 111 | 4691 | 1  | 90 | 1 | 7   | 27 |
| 112 | 4576 | 14 | 85 | 1 | 20  | 29 |
| 113 | 4485 | 14 | 95 | 1 | 14  | 28 |
| 114 | 4389 | 1  | 35 | 1 | 30  | 19 |
| 115 | 5528 | 18 | 30 | 2 | -10 | 0  |
| 116 | 5451 | 18 | 30 | 2 | -10 | 0  |
| 117 | 3695 | 9  | 65 | 1 | 21  | 27 |
| 118 | 3602 | 9  | 65 | 1 | 21  | 3  |
| 119 | 3569 | 6  | 65 | 1 | 21  | 3  |
| 120 | 3583 | 6  | 35 | 1 | 21  | 3  |
| 121 | 3581 | 1  | 65 | 3 | 21  | 3  |
| 122 | 3565 | 19 | 30 | 1 | 21  | 3  |
| 123 | 3565 | 19 | 70 | 1 | 21  | 3  |
| 125 | 3739 | 18 | 45 | 2 | 14  | 15 |
| 126 | 3783 | 12 | 35 | 2 | 14  | 15 |

|     |      |    |    |   |    |    |
|-----|------|----|----|---|----|----|
| 127 | 3783 | 12 | 35 | 2 | 28 | 32 |
| 128 | 3922 | 1  | 65 | 1 | 28 | 32 |
| 129 | 3921 | 9  | 65 | 1 | 28 | 32 |
| 130 | 3919 | 6  | 35 | 2 | 23 | 30 |
| 131 | 3919 | 6  | 45 | 2 | 23 | 30 |
| 132 | 3849 | 19 | 65 | 1 | 25 | 33 |
| 133 | 3853 | 19 | 65 | 1 | 30 | 8  |
| 134 | 3853 | 6  | 10 | 1 | 30 | 8  |
| 135 | 3853 | 9  | 70 | 1 | 30 | 8  |
| 136 | 3853 | 9  | 90 | 1 | 30 | 8  |
| 137 | 3853 | 9  | 85 | 1 | 30 | 34 |
| 138 | 3851 | 9  | 70 | 3 | 30 | 34 |
| 139 | 3896 | 1  | 55 | 3 | 27 | 37 |
| 140 | 3943 | 1  | 60 | 1 | 27 | 37 |
| 141 | 4013 | 18 | 45 | 2 | 0  | 0  |
| 142 | 4546 | 14 | 75 | 1 | 0  | 0  |
| 145 | 4342 | 1  | 20 | 2 | 0  | 0  |
| 146 | 4543 | 14 | 55 | 1 | 0  | 0  |
| 147 | 5055 | 14 | 45 | 1 | 0  | 0  |
| 149 | 5031 | 4  | 80 | 1 | 0  | 0  |
| 150 | 4798 | 1  | 75 | 1 | 0  | 0  |
| 162 | 5058 | 14 | 95 | 1 | 0  | 0  |
| 163 | 4987 | 14 | 80 | 1 | 0  | 0  |
| 164 | 4595 | 17 | 75 | 1 | 0  | 0  |
| 165 | 4581 | 17 | 80 | 1 | 0  | 0  |
| 166 | 4591 | 17 | 80 | 1 | 0  | 0  |
| 167 | 4820 | 17 | 85 | 1 | 0  | 0  |
| 168 | 4779 | 17 | 85 | 1 | 0  | 0  |

|     |      |    |    |   |   |   |
|-----|------|----|----|---|---|---|
| 169 | 4659 | 14 | 60 | 1 | 0 | 0 |
| 170 | 4787 | 17 | 65 | 1 | 0 | 0 |
| 171 | 4719 | 1  | 30 | 5 | 0 | 0 |
| 172 | 4732 | 14 | 55 | 1 | 0 | 0 |
| 173 | 4663 | 14 | 55 | 1 | 0 | 0 |
| 174 | 4616 | 14 | 55 | 5 | 0 | 0 |
| 175 | 4832 | 14 | 55 | 5 | 0 | 0 |
| 177 | 5031 | 15 | 35 | 1 | 0 | 0 |
| 178 | 5182 | 14 | 60 | 1 | 0 | 0 |
| 179 | 5253 | 6  | 35 | 1 | 0 | 0 |
| 181 | 4658 | 14 | 70 | 1 | 0 | 0 |
| 182 | 5061 | 14 | 75 | 1 | 0 | 0 |
| 183 | 4911 | 14 | 75 | 1 | 0 | 0 |
| 184 | 5570 | 10 | 45 | 2 | 0 | 0 |
| 185 | 4525 | 10 | 45 | 1 | 0 | 0 |
| 186 | 4268 | 1  | 60 | 1 | 0 | 0 |
| 187 | 3697 | 9  | 80 | 1 | 0 | 0 |
| 188 | 4600 | 14 | 65 | 1 | 0 | 0 |
| 189 | 4560 | 14 | 55 | 1 | 0 | 0 |
| 190 | 4500 | 14 | 55 | 1 | 0 | 0 |
| 191 | 3697 | 20 | 65 | 1 | 0 | 0 |
| 192 | 4950 | 14 | 45 | 1 | 0 | 0 |
| 193 | 5200 | 14 | 70 | 1 | 0 | 0 |
| 194 | 4700 | 14 | 75 | 1 | 0 | 0 |
| 195 | 4900 | 14 | 35 | 1 | 0 | 0 |
| 196 | 5000 | 14 | 35 | 1 | 0 | 0 |
| 197 | 5100 | 14 | 60 | 1 | 0 | 0 |
| 198 | 5150 | 14 | 45 | 1 | 0 | 0 |

|     |      |    |    |   |   |   |
|-----|------|----|----|---|---|---|
| 199 | 5250 | 14 | 50 | 1 | 0 | 0 |
| 200 | 4300 | 14 | 70 | 1 | 0 | 0 |
| 201 | 4730 | 14 | 70 | 1 | 0 | 0 |
| 202 | 4370 | 14 | 70 | 1 | 0 | 0 |
| 203 | 4720 | 14 | 70 | 1 | 0 | 0 |
| 204 | 4710 | 14 | 70 | 1 | 0 | 0 |
| 206 | 4590 | 14 | 35 | 1 | 0 | 0 |
| 207 | 4670 | 14 | 65 | 1 | 0 | 0 |
| 209 | 4480 | 14 | 45 | 3 | 0 | 0 |
| 211 | 4600 | 14 | 75 | 1 | 0 | 0 |
| 212 | 4480 | 14 | 70 | 1 | 0 | 0 |
| 214 | 4668 | 14 | 50 | 1 | 0 | 0 |
| 215 | 4570 | 14 | 50 | 4 | 0 | 0 |
| 216 | 4300 | 14 | 50 | 6 | 0 | 0 |
| 217 | 4400 | 14 | 50 | 1 | 0 | 0 |
| 218 | 4390 | 14 | 50 | 1 | 0 | 0 |
| 220 | 4300 | 14 | 50 | 1 | 0 | 0 |
| 221 | 4370 | 14 | 50 | 2 | 0 | 0 |

**Note:** Veg-types represents vegetation type, Veg-cover represents vegetation cover, Temp represents temperature, and TDR 3.8 represents soil moisture at a depth of 3.8 cm.
